# Supplementary material for: Peatlands’ O₂ Pulses: Time-resolved Terrestrial Oxygen Production in the Central Congo Basin over the Holocene
Source: Research Square preprint supplement (doi:10.21203/rs.3.rs-7398366/v1), 2025-09-24
Supplement: Supplementary file 1 [file c28d59fd3a94f1c65ef5e610.pdf]

## Supplementary Information A and B

### A. Methods Extensions

#### S1. Redox titration

Redox titrations quantified the oxygen demand ( $dO_2$ ) for sample combustion, reflecting the  $O_2$  preserved by carbon burial. The method closely follows the protocol outlined in (1). Briefly, after sieving (250  $\mu m$ ) and homogenizing the freeze-dried peat material, an aliquot is placed in a quartz tube enclosing a container filled with a large excess of CuO— the oxygen donor. The reactor is then flame-sealed under vacuum (ca. 5  $\mu bar$ ) and gradually heated to 900  $^{\circ}C$  where it is left to react for 10 hours. At these nominal experimental conditions, the CuO-Cu<sub>2</sub>O redox couple buffers the partial pressure of  $O_2$  in the system (2) at  $pO_2 \sim 10^{-6}$  bar within minutes. These conditions are sufficient to oxidize most redox active elements present in the sample, in particular C, S and Fe (1). A sample is considered fully oxidized when all of its elements have reached their highest oxidation state,  $C^{4+}$ ,  $Fe^{3+}$  and  $S^{6+}$ . Weighing the O donor (CuO) prior to, and after, combustion provides a robust quantification of O consumption. This weight loss, corresponding to total mass of O consumed ( $nO$  mol), provides the absolute redox capacities,  $\Delta O_2 = \frac{1}{2} nO$  (mol), and mass specific redox capacities,  $dO_2 = \Delta O_2$  (mol)/ $m$ (g), where  $m$  is the mass of the sample. Precision measured by repeated measurements of known standards is typically within 5% (1). The metric  $dO_2^*$  is obtained by normalizing the absolute redox capacity  $\Delta O_2$  to TOC ( $dO_2^* = 100 \times \Delta O_2 / TOC$ ), not sample mass. Mass of  $O_2$  reservoirs is provided in Pg ( $\equiv$ Gt), or Tg ( $\equiv$ Mt).

#### S2. Redox Stoichiometry:

The redox stoichiometry (0.9–1.15 mol  $O_2$ /mol C) was calculated as:

$$O_2:C = 12 \times dO_2^*$$

where  $dO_2^*$  is in mol  $O_2$ /g TOC (0.08–0.095), multiplied by the molar mass of C ( $M_C = 12$  g/mol). This yields:

$$O_2:C \approx 0.9\text{--}1.15$$

This ratio reflects peat's oxygen-rich composition (e.g., cellulose, lignins), reducing external  $O_2$  demand compared to pure carbon ( $O_2:C = 1$ ). Unlike photosynthetic  $O_2:C$  ratios ( $\sim 1$  for glucose), this method captures burial-specific stoichiometry, a novel contribution to atmospheric  $O_2$  modeling.

### S3. Novelty of Redox Stoichiometry

The redox stoichiometry is a novel metric, distinct from photosynthetic or biomass-based ratios, as it quantifies  $O_2$  spared by burial. Unlike carbon-focused studies (3), this approach directly links terrestrial redox processes to atmospheric  $O_2$ , offering new constraints for models (e.g., GEOCARBSULF;(4)).

### S4. Materials and Thermal characteristics

#### The IMB100 peat core

The Imbonga (IMB100) peat core was recovered in 2017 from the Ingende Territory (Equateur Province) in the Democratic Republic of Congo (DRC) at the northern edge of a small basin filled with peat, around 800 m away from the Momboyo River, a tributary of the Ruki River (0.856693°S and 19.808078°E, 320 m; Fig. 1A). The sedimentology, age/depth model ( $^{14}C$ ), and palaeo-environmental context inherent to core IMB100 are described extensively in (5). In summary, a total of 17 fine fraction samples ( $<150\ \mu m$ ) were used to construct the age-depth model using rbacon (version 2.7) in R (version 4.1.0) (6).  $^{14}C$  dates were calibrated using a mixed curve 50%:50% of north-south air-mass mixing derived from both the Northern Hemisphere curve (IntCal20, (7)) and the Southern Hemisphere curve (SHCal20, (8)).

The 237 cm-long IMB100 core is characterized by distinct phases of peat accumulation, initially transitioning from an organic carbon-rich floodplain to a forested marshland, which later became

disconnected from the river, and finally to a closed-canopy swamp forest. Peat development began at ~10.6 kyr BP in response to increasing precipitation as inferred from plant wax hydrogen isotope ( $\delta D_n$ -C29) data (5). By ~8.7 kyr BP, the terrestrialization of the peatland coincided with the establishment of a closed canopy forest. Before ~10.6 kyr BP, old (of up to 38 kyr BP) and scattered radiocarbon ( $^{14}C$ ) ages suggest that allochthonous material was incorporated into the fluvial sediments making the chronology uncertain (5). Between 124 cm and 100 cm (i.e. 7.5 kyr - 2.3 kyr BP), the slope of the modelled age/depth profile is 6 to 10 times lower than in the peat sections immediately below and above. This interval has been referred as the "Ghost Interval", an interval of extensively decomposed peat material observed across the central Congo peatlands (9)

TGA. The thermal and calorimetric properties of the samples were measured using a hybridized TGA/DSC-microGC system at the University of Lausanne (UNIL). The TGA/DSC3+ (Mettler Toledo) is coupled to a 990 microGC (Agilent) via a transfer line maintained at 80 °C. Samples were heated at 10 °C/min from 100 to 1000 °C under a 10:1  $N_2$ - $O_2$  atmosphere. All gases used were of high purity (> 5.8) and supplied by Carbagas and Linde. Thermograms were processed using a kinetic inversion code developed by Hemingway et al. (10), adapted for the inhouse analytical setup. By converting the thermograms into kinetograms, the inversion provides apparent activation energies (aEa), assuming a constant prefactor in the Arrhenius model. We found that a prefactor of  $10^{8.5}$  which reliably reproduces the known activation energy of calcite (170-190 kJ/mol) and graphite (180-190 kJ/mol) using a Model-Free Kinetics (MFK) approach. All kinetograms presented here were obtained with a smoothing factor of 4 (SI Fig. 1), which optimally balances spectral detail and smoothness.

TOC data have been obtained using Rock-Eval pyrolysis at UNIL. The TOC concentrations were obtained on the same sample material that has been used for the  $dO_2$  analyses (and hence for establishing the TOC vs.  $dO_2$  correlation). The principle of Rock-Eval analysis is explained in details elsewhere (11, 12). In brief, two heating ramps are determined, the first under  $N_2$  atmosphere and the second under air. The gas

produced during the first ramp (200 to 650 °C) is analyzed for hydrocarbons by a flame ionization detector (FID) and for CO<sub>2</sub> (and CO) using an infrared (IR) detector. The residue of the first pyrolysis step is introduced in a combustion chamber, and the evolved gas is analyzed for CO<sub>2</sub> (and CO) (11, 12). The total organic carbon (TOC) parameter is obtained following a standard procedure as revised by (13). In the absence of carbonates, the organic C content corresponds to the sum of all the carbon moieties (TOC and MINC, which represent the organic and mineral C content, respectively) released during pyrolysis and oxidation. Ultimately, a correcting factor of 1.166256 is applied to biopolymer-rich samples such as forest soil litter or peat material. This correction to the ‘hydrocarbon yield factor’ (14) ensures compatibility between Rock-Eval TOC- (TOC-RE) and EA TOC- (TOC-EA) derived values (13). This also ensures consistency with the basin wide TOC data published in (9, 15) that are also used here for the basin wide GIS O<sub>2</sub> mapping.

Sedimentary material thermal characteristics obtained by TGA-microGC. Probability density distribution,  $p(o,E)$ , based on mass loss characteristics of the sample in oxidizing atmosphere.

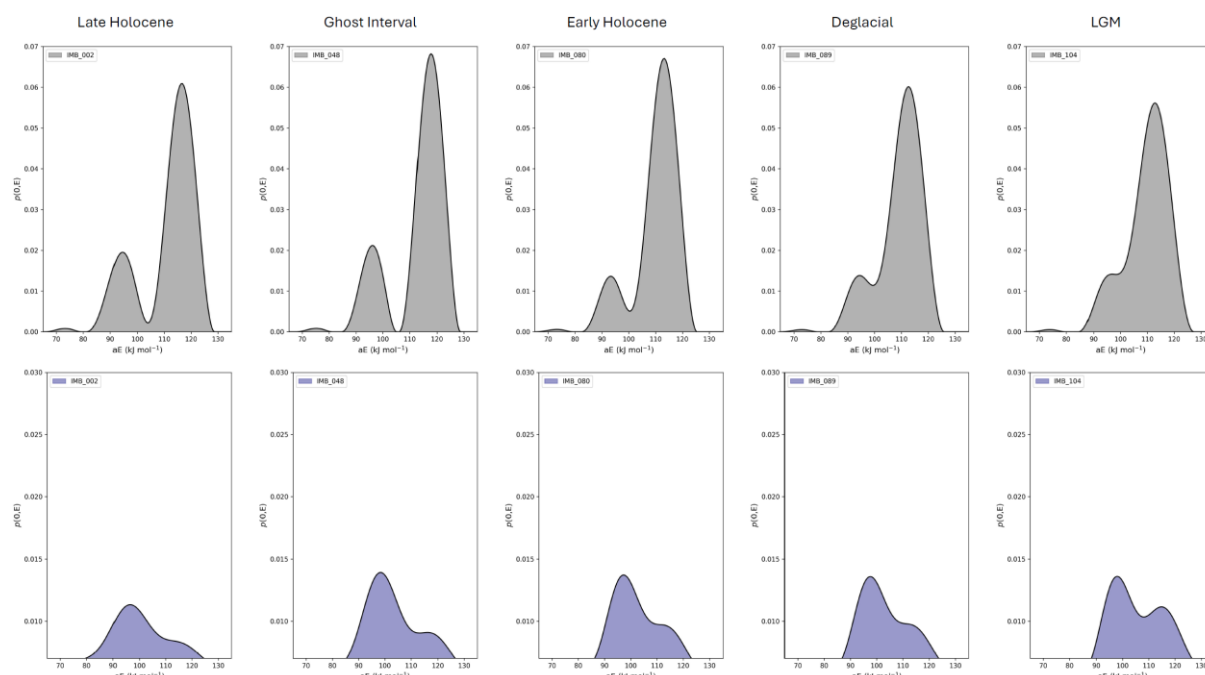

Thermogravimetric analysis (TGA) identified two organic matter pools in the IMB100 core (Fig. 1A,B): a labile fraction (decomposing at 370°C, activation energy E = 90 kJ/mol), comprising fresh plant litter and carbohydrates, and a refractory fraction (450°C, E = 110 kJ/mol), including lignocellulosic and aromatic compounds. The labile-to-refractory (L/R) ratio declined from 0.3 in surface peats to 0.2 at depth, reflecting selective preservation. During the Ghost Interval, both fractions showed a 5 kJ/mol E increase, indicating drier conditions favored recalcitrant compounds.

## S5. Supplemental Table 1

| Samples  | Depth (cm) | Depth_mean (cm) | Thickness (cm) | Age med. (yr) | TOC (raw %) | TOC (corr %) | Peak_1_Ea (kJ/mol) | peak_1_area AU | Peak_2_Ea (kJ/mol) | peak_2_area AU | P1/P2 ratio | dO <sub>2</sub> (μmol/g) | dO <sub>2</sub> * (μmol/g TOC) | Stoichiometric ratio (O <sub>2</sub> :C mol/mol) | Time interval        |
|----------|------------|-----------------|----------------|---------------|-------------|--------------|--------------------|----------------|--------------------|----------------|-------------|--------------------------|--------------------------------|--------------------------------------------------|----------------------|
| IMB1.002 | 16-18      | 17              | 19.0           | 215           | 39.1        | 47.4         | 94.2               | 0.2            | 116.8              | 0.8            | 0.3         | 44021                    | 92965                          | 1.12                                             | Late Holocene        |
| IMB1.004 | 20-22      | 21              | 4.0            | 320           | 44.0        | 52.8         | 95.7               | 0.2            | 117.8              | 0.8            | 0.3         | 48271                    | 91358                          | 1.10                                             | Late Holocene        |
| IMB1.006 | 24-26      | 25              | 4.0            | 442           | 42.0        | 50.8         | 95.7               | 0.2            | 117.3              | 0.8            | 0.3         | 46832                    | 92242                          | 1.11                                             | Late Holocene        |
| IMB1.008 | 28-30      | 29              | 4.0            | 570           | 43.3        | 52.0         | 92.7               | 0.2            | 114.3              | 0.8            | 0.3         | 48998                    | 94145                          | 1.13                                             | Late Holocene        |
| IMB1.010 | 32-34      | 33              | 5.0            | 703           | 44.5        | 53.9         | 92.7               | 0.2            | 114.3              | 0.8            | 0.2         | 48114                    | 89325                          | 1.07                                             | Late Holocene        |
| IMB1.013 | 38-40      | 39              | 6.0            | 905           | 44.0        | 53.7         | 93.7               | 0.2            | 115.3              | 0.8            | 0.3         | 46111                    | 85858                          | 1.03                                             | Late Holocene        |
| IMB1.016 | 44-46      | 45              | 6.0            | 1007          | 41.9        | 50.9         | 95.2               | 0.2            | 116.8              | 0.8            | 0.3         | 46875                    | 92121                          | 1.11                                             | Late Holocene        |
| IMB1.019 | 50-52      | 51              | 6.0            | 1122          | 41.6        | 50.2         | 95.7               | 0.2            | 117.8              | 0.8            | 0.3         | 47286                    | 94138                          | 1.13                                             | Late Holocene        |
| IMB1.022 | 56-58      | 57              | 6.0            | 1240          | 45.8        | 55.5         | 95.7               | 0.2            | 117.3              | 0.8            | 0.3         | 46038                    | 82986                          | 1.00                                             | Late Holocene        |
| IMB1.025 | 62-64      | 63              | 5.0            | 1360          | 40.8        | 49.7         | 94.7               | 0.2            | 116.8              | 0.8            | 0.3         | na                       | na                             | na                                               | Late Holocene        |
| IMB1.027 | 66-68      | 67              | 4.0            | 1435          | 42.1        | 51.1         | 94.7               | 0.2            | 116.3              | 0.8            | 0.3         | 47627                    | 93282                          | 1.12                                             | Late Holocene        |
| IMB1.029 | 70-72      | 71              | 4.0            | 1509          | 42.9        | 52.6         | 94.7               | 0.2            | 115.8              | 0.8            | 0.3         | 47154                    | 89713                          | 1.08                                             | Late Holocene        |
| IMB1.031 | 74-76      | 75              | 5.0            | 1572          | 41.9        | 50.8         | 95.2               | 0.2            | 116.8              | 0.8            | 0.3         | 46538                    | 91535                          | 1.10                                             | Late Holocene        |
| IMB1.034 | 80-82      | 81              | 6.0            | 1676          | 42.3        | 51.8         | 95.2               | 0.2            | 116.8              | 0.8            | 0.3         | 46767                    | 90310                          | 1.08                                             | Late Holocene        |
| IMB1.037 | 86-88      | 87              | 6.0            | 1782          | 41.7        | 50.8         | 95.2               | 0.2            | 116.8              | 0.8            | 0.3         | 46616                    | 91824                          | 1.10                                             | Late Holocene        |
| IMB1.040 | 92-94      | 93              | 4.0            | 1882          | 43.9        | 53.0         | 95.7               | 0.2            | 117.8              | 0.8            | 0.3         | na                       | na                             | na                                               | Late Holocene        |
| IMB1.041 | 94-96      | 95              | 3.0            | 1917          | 44.6        | 54.1         | 95.2               | 0.2            | 117.3              | 0.8            | 0.3         | 44097                    | 81471                          | 0.98                                             | Late Holocene        |
| IMB1.043 | 98-100     | 99              | 3.0            | 2056          | 43.0        | 52.3         | 95.2               | 0.2            | 116.8              | 0.8            | 0.3         | 48117                    | 92053                          | 1.10                                             | Ghost Interval       |
| IMB1.044 | 100-102    | 101             | 2.0            | 2257          | 43.3        | 52.6         | 95.7               | 0.2            | 117.3              | 0.8            | 0.3         | 48924                    | 92966                          | 1.12                                             | Ghost Interval       |
| IMB1.045 | 102-104    | 103             | 2.0            | 2590          | 46.1        | 56.0         | 95.2               | 0.2            | 116.8              | 0.8            | 0.3         | 48473                    | 86558                          | 1.04                                             | Ghost Interval       |
| IMB1.046 | 104-106    | 105             | 2.0            | 2905          | 44.5        | 53.6         | 95.7               | 0.2            | 117.3              | 0.8            | 0.3         | 49042                    | 91425                          | 1.10                                             | Ghost Interval       |
| IMB1.047 | 106-108    | 107             | 2.0            | 3042          | 47.4        | 57.0         | 96.2               | 0.2            | 117.3              | 0.8            | 0.3         | 50205                    | 89082                          | 1.06                                             | Ghost Interval       |
| IMB1.048 | 108-110    | 109             | 2.0            | 3178          | 47.1        | 56.6         | 96.2               | 0.2            | 117.8              | 0.8            | 0.3         | 51913                    | 91729                          | 1.10                                             | Ghost Interval       |
| IMB1.049 | 110-112    | 111             | 3.0            | 3578          | 46.8        | 56.6         | 96.2               | 0.2            | 117.8              | 0.8            | 0.3         | 51313                    | 90693                          | 1.09                                             | Ghost Interval       |
| IMB1.051 | 114-116    | 115             | 3.0            | 4890          | 48.0        | 58.2         | 95.2               | 0.2            | 116.8              | 0.8            | 0.2         | 51270                    | 88158                          | 1.06                                             | Ghost Interval       |
| IMB1.052 | 116-118    | 117             | 2.0            | 5621          | 47.2        | 57.1         | 96.2               | 0.2            | 117.8              | 0.8            | 0.2         | 50465                    | 88372                          | 1.06                                             | Ghost Interval       |
| IMB1.053 | 118-120    | 119             | 3.0            | 6359          | 45.6        | 55.0         | 95.2               | 0.2            | 116.8              | 0.8            | 0.3         | 48693                    | 88589                          | 1.06                                             | Ghost Interval       |
| IMB1.055 | 122-124    | 123             | 4.0            | 7496          | 44.1        | 53.5         | 94.7               | 0.2            | 115.8              | 0.8            | 0.2         | 46984                    | 87839                          | 1.05                                             | Ghost Interval       |
| IMB1.057 | 126-128    | 127             | 3.0            | 8251          | 44.2        | 53.9         | 94.7               | 0.2            | 116.3              | 0.8            | 0.2         | 46949                    | 87113                          | 1.05                                             | Early Holocene       |
| IMB1.058 | 128-130    | 129             | 2.0            | 8439          | 43.2        | 52.6         | 94.2               | 0.2            | 115.8              | 0.8            | 0.2         | na                       | na                             | na                                               | Early Holocene       |
| IMB1.059 | 130-132    | 131             | 3.0            | 8561          | 42.9        | 52.3         | 94.7               | 0.2            | 115.8              | 0.8            | 0.3         | 46858                    | 89527                          | 1.07                                             | Early Holocene       |
| IMB1.061 | 134-136    | 135             | 5.0            | 8649          | 42.8        | 52.0         | 94.2               | 0.2            | 115.8              | 0.8            | 0.2         | 45887                    | 88280                          | 1.06                                             | Early Holocene       |
| IMB1.064 | 140-142    | 141             | 4.0            | 8789          | 43.6        | 53.1         | 94.2               | 0.2            | 115.8              | 0.8            | 0.2         | 44072                    | 82965                          | 1.00                                             | Early Holocene       |
| IMB1.065 | 142-144    | 143             | 3.0            | 8837          | 43.1        | 52.3         | 94.7               | 0.2            | 115.8              | 0.8            | 0.3         | 45369                    | 86790                          | 1.04                                             | Early Holocene       |
| IMB1.067 | 146-148    | 147             | 3.0            | 8934          | 44.7        | 54.5         | 94.2               | 0.2            | 115.3              | 0.8            | 0.2         | 45036                    | 82599                          | 0.99                                             | Early Holocene       |
| IMB1.068 | 148-150    | 149             | 4.0            | 8989          | 44.2        | 54.3         | 94.2               | 0.2            | 115.3              | 0.8            | 0.2         | 44784                    | 82542                          | 0.99                                             | Early Holocene       |
| IMB1.071 | 154-156    | 155             | 6.0            | 9242          | 45.0        | 54.4         | 92.7               | 0.2            | 113.3              | 0.8            | 0.2         | 41573                    | 76387                          | 0.92                                             | Early Holocene       |
| IMB1.074 | 160-162    | 161             | 6.0            | 9571          | 42.3        | 51.6         | 92.7               | 0.2            | 113.3              | 0.8            | 0.2         | 40488                    | 78480                          | 0.94                                             | Early Holocene       |
| IMB1.077 | 166-168    | 167             | 6.0            | 9903          | 42.3        | 51.4         | 99.7               | 0.1            | 119.8              | 0.9            | 0.2         | na                       | na                             | na                                               | Early Holocene       |
| IMB1.080 | 172-174    | 173             | 6.0            | 10227         | 42.4        | 51.5         | 93.2               | 0.1            | 113.3              | 0.9            | 0.2         | 42722                    | 82945                          | 1.00                                             | Early Holocene       |
| IMB1.083 | 178-180    | 179             | 4.0            | 10542         | 44.1        | 53.7         | 94.2               | 0.1            | 113.3              | 0.9            | 0.2         | na                       | na                             | na                                               | Early Holocene       |
| IMB1.084 | 180-182    | 181             | 3.0            | 10711         | 42.5        | 51.5         | 94.2               | 0.1            | 113.8              | 0.8            | 0.2         | 42605                    | 82673                          | 0.99                                             | Early Holocene       |
| IMB1.086 | 184-186    | 185             | 5.0            | 11132         | 37.6        | 45.6         | 94.7               | 0.1            | 113.3              | 0.9            | 0.2         | na                       | na                             | na                                               | Deglacial            |
| IMB1.089 | 190-192    | 191             | 4.0            | 18424         | 36.7        | 44.6         | 94.2               | 0.1            | 112.8              | 0.8            | 0.2         | 40221                    | 90209                          | 1.08                                             | Deglacial            |
| IMB1.090 | 192-194    | 193             | 3.0            | 19695         | 34.3        | 41.7         | 96.7               | 0.1            | 114.8              | 0.8            | 0.2         | na                       | na                             | na                                               | Deglacial            |
| IMB1.092 | 196-198    | 197             | 5.0            | 21118         | 32.7        | 39.7         | 95.2               | 0.1            | 112.8              | 0.8            | 0.2         | na                       | na                             | na                                               | Last Glacial Maximum |
| IMB1.095 | 202-204    | 203             | 4.0            | 21475         | 26.6        | 32.5         | 96.2               | 0.1            | 112.3              | 0.9            | 0.1         | 27634                    | 85086                          | 1.02                                             | Last Glacial Maximum |
| IMB1.096 | 204-206    | 205             | 3.0            | 21561         | 24.8        | 30.2         | 95.7               | 0.1            | 112.3              | 0.8            | 0.2         | 22711                    | 75221                          | 0.90                                             | Last Glacial Maximum |
| IMB1.098 | 208-210    | 209             | 5.0            | 21762         | 21.6        | 26.4         | 97.2               | 0.1            | 113.3              | 0.9            | 0.1         | 22711                    | 86115                          | 1.03                                             | Last Glacial Maximum |
| IMB1.101 | 214-216    | 215             | 4.0            | 22626         | 23.0        | 28.1         | 96.2               | 0.1            | 112.8              | 0.8            | 0.2         | na                       | na                             | na                                               | Last Glacial Maximum |
| IMB1.102 | 216-218    | 217             | 3.0            | 22790         | 21.1        | 25.7         | 96.2               | 0.1            | 113.3              | 0.8            | 0.2         | na                       | na                             | na                                               | Last Glacial Maximum |
| IMB1.104 | 220-222    | 221             | 5.0            | 23240         | 22.1        | 26.9         | 96.7               | 0.1            | 112.8              | 0.9            | 0.1         | 22845                    | 84786                          | 1.02                                             | Last Glacial Maximum |
| IMB1.107 | 226-228    | 227             | 4.0            | 24337         | 20.3        | 24.7         | 101.3              | 0.2            | 119.8              | 0.8            | 0.2         | na                       | na                             | na                                               | Last Glacial Maximum |
| IMB1.108 | 228-230    | 229             | 3.0            | 24675         | 20.6        | 25.1         | 97.2               | 0.1            | 113.8              | 0.9            | 0.1         | 21618                    | 86296                          | 1.04                                             | Last Glacial Maximum |
| IMB1.110 | 232-234    | 233             | 2.0            | 25405         | 18.8        | 23.1         | 96.7               | 0.1            | 112.8              | 0.9            | 0.1         | na                       | na                             | na                                               | Last Glacial Maximum |

99

100

101 S6. Geospatial analysis: TOC vs  $dO_2$

102 Correlation between TOC (corrected) values for the IMB core (this work) and  $dO_2$  values (SI Table 1) used

103 for  $O_2$  production reconstructions.

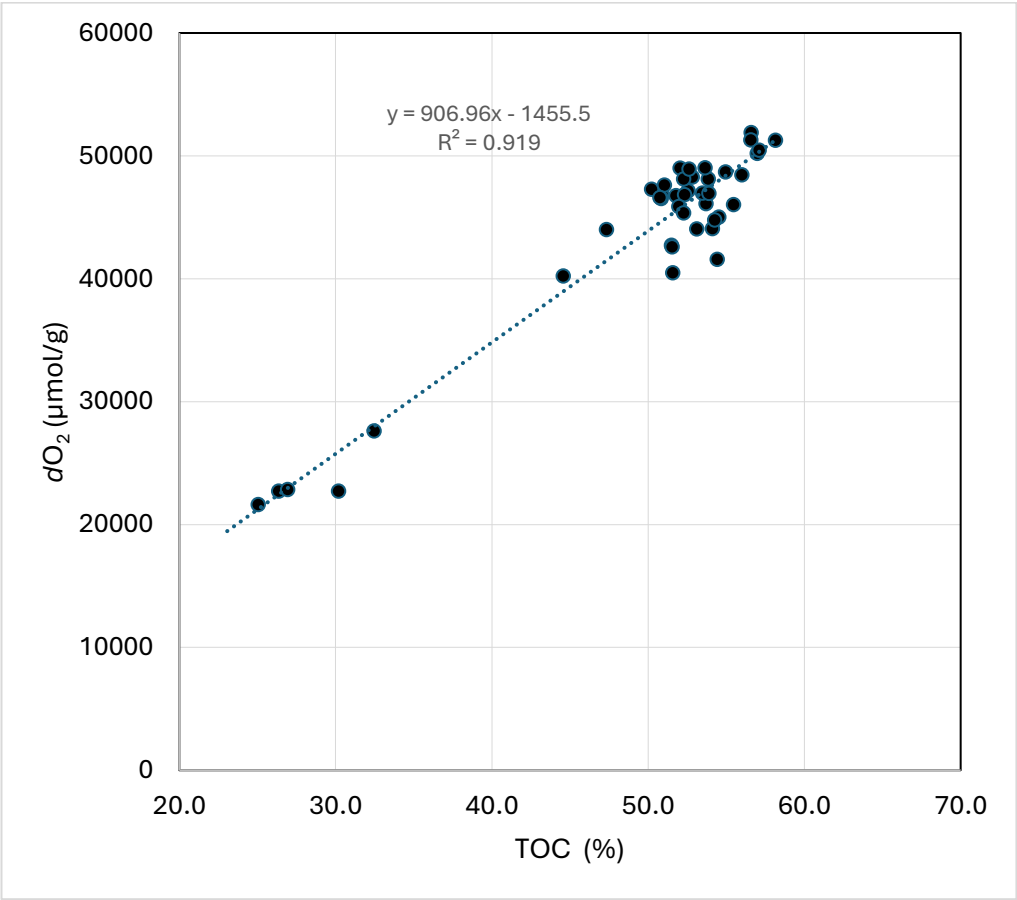

104

105 S7. Geospatial analysis

106 Correlation between TOC and peat thickness

107 Using field data such as peat thickness (Fig 1B), sediment bulk density and organic carbon

108 concentrations, (15) have established a relationship between peat thickness and peat carbon density for

109 the central Congo Basin. In the same way, we used field data from (15) to construct a peat-thickness-total

110 organic carbon regression (SI Fig 2) to spatially model peat TOC content (Fig. 1C). We then applied the

regression between TOC values for the IMB100 core (see S6) and  $dO_2$  values to the TOC content map to spatially model  $dO_2$  at the basin scale (Fig. 3B).

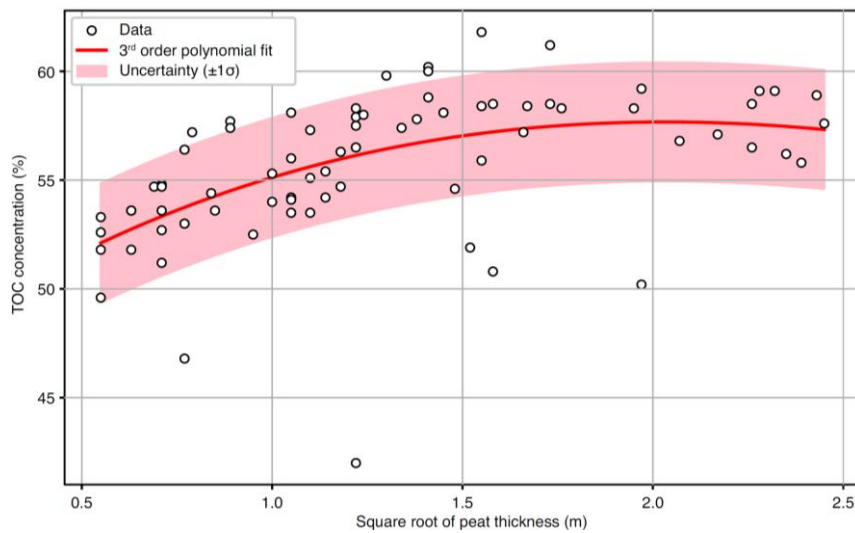

S8. Flux uncertainties ( $\pm 10 \text{ Pg O}_2$ ) was computed with a Monte Carlo simulation (2000 iterations) which incorporated variable peat density (normal distribution with mean  $0.17 \text{ g/cm}^3$ ,  $1\sigma = 0.01 \text{ g/cm}^3$ , providing values normally distributed in between minima at ca. 0.15 and maxima at ca. 0.19),  $dO_2$  ( $\pm 5\%$ ), and spatial variability (uniform sampling between 167600 and 185900  $\text{km}^2$ ).

## B. Global Context

S9. Amazon  $O_2$  production

We estimate the Amazon's net O<sub>2</sub> production at ~20–40 Tg O<sub>2</sub> yr<sup>-1</sup>, derived from its net ecosystem production (NEP; 0.05–0.1 Pg C yr<sup>-1</sup>, (16, 17) and stoichiometric conversion using an O<sub>2</sub>:C molar ratio of ~1.1 mol/mol. This estimate converts NEP carbon fluxes to O<sub>2</sub> production, accounting for photosynthetic O<sub>2</sub> release relative to carbon fixation, with uncertainties reflecting variability in NEP and stoichiometric assumptions.

#### S10. Marine DOC O<sub>2</sub> sink

The highly recalcitrant dissolved organic carbon (DOC) reservoir in the global ocean, primarily the refractory DOC (DOCR) pool, contains approximately 640 Pg C, constituting ~97% of the total marine DOC pool of ~662 Pg C. This reservoir, concentrated in the deep ocean, exhibits remarkable stability with radiocarbon ages ranging from 4,000 to 6,000 years, reflecting its resistance to microbial degradation. Its vast size, comparable to atmospheric CO<sub>2</sub>, and millennial persistence make it a critical component of long-term carbon sequestration, as quantified by (18) and (19) using global oceanographic data.

#### S11. Global peatland and geological O<sub>2</sub> flux estimates

Peatlands are critical carbon sinks, contributing to atmospheric O<sub>2</sub> through Holocene (11,700 years) carbon sequestration. Tropical peatlands (380,000–657,000 km<sup>2</sup>) store 110–140 Pg C, including 81–92 Pg from Southeast Asian and Peruvian Amazon peatlands (3, 20) and 30 Pg from the Congo Basin (3, 21). Boreal peatlands (3,100,000–3,900,000 km<sup>2</sup>) store 265–565 Pg C, with ~300 Pg accumulated during the Holocene (22, 23). Global peat carbon stocks are estimated at 598–618 Pg (best estimate: 610 Pg), excluding Congo (20). O<sub>2</sub> fluxes are calculated assuming an O<sub>2</sub>:C stoichiometry of 0.9–1.15 mol/mol.

For example, Southeast Asian peatlands (67.5 Pg C, mid-range) sequester  $5.769 \times 10^{12}$  g C yr<sup>-1</sup> ( $6.75 \times 10^{16}$  g ÷ 11,700 yr), equivalent to  $4.808 \times 10^{11}$  mol C yr<sup>-1</sup> (÷ 12 g/mol). With a 1.025 O<sub>2</sub>/C molar ratio, this produces  $4.928 \times 10^{11}$  mol O<sub>2</sub> yr<sup>-1</sup>, or 15.8 Tg O<sub>2</sub> yr<sup>-1</sup> (× 32 g/mol), yielding 184.5 Pg O<sub>2</sub> over 11,700 years.



Table S5 summarizes carbon stocks, accumulation rates, and O<sub>2</sub> fluxes, with a global O<sub>2</sub> contribution of ~1161.6 Pg.

Global estimated oxygen production of 99.3 [84.1-115.4] represents about 30 % of the global marine O<sub>2</sub> net production flux, estimated at ~336 Tg O<sub>2</sub> yr<sup>-1</sup> [126 Tg C yr<sup>-1</sup>] by (24).

## S12. Oxidative Weathering O<sub>2</sub> Sinks

- OC<sub>petro</sub> weathering

Hilton and West (25) estimate modern OC<sub>petro</sub> weathering at ~70 Tg C/yr (40–100 Tg C/yr), releasing CO<sub>2</sub> and consuming O<sub>2</sub> via equation 1, main text. With a 1:1 O<sub>2</sub>:C mol/mol ratio (2.6667 g O<sub>2</sub>/g C):

O<sub>2</sub> consumption: 70 × 2.6667 = 187 Tg O<sub>2</sub> yr<sup>-1</sup> (107–267 Tg O<sub>2</sub> yr<sup>-1</sup>).

- Sulfide (FeS<sub>2</sub>) Weathering O<sub>2</sub> Sinks

Burke et al. (2018) estimate modern sulfide weathering at 1.3 ± 0.2 Tmol S/yr (41.6 Tg S/yr), via FeS<sub>2</sub> + 15/4 O<sub>2</sub> + 7/2 H<sub>2</sub>O = FeOH<sub>3</sub> + 2 H<sub>2</sub>SO<sub>4</sub>

O<sub>2</sub> consumption: 41.6 × 1.875 = 78 Tg O<sub>2</sub> yr<sup>-1</sup> (66–90 Tg O<sub>2</sub> yr<sup>-1</sup>).

| Process                     | C/S Flux (Tg yr <sup>-1</sup> ) | O <sub>2</sub> :Substrate Ratio | O <sub>2</sub> Consumption (Tg yr <sup>-1</sup> ) | Source               |
|-----------------------------|---------------------------------|---------------------------------|---------------------------------------------------|----------------------|
| Petrogenic OC               | 70 [40–100] C                   | 2.67 (g O <sub>2</sub> /g C)    | 187 [106–267]                                     | Hilton & West (2020) |
| Sulfide (FeS <sub>2</sub> ) | 42 [33–50] S                    | 1.875 (g O <sub>2</sub> /g S)   | 78 [66–90]                                        | Burke et al. (2018)  |

Notes: Values are midpoints with ranges in parentheses. O<sub>2</sub> fluxes assume an O<sub>2</sub>/C stoichiometry of 0.9–1.15 mol/mol. Global Total sums Total Tropical and Boreal contributions. Total tropical peatlands includes additional, smaller peatlands areas not reported in this table, but presented a thoroughly reviewed in (Page, 2011 #6167). OC = Organic carbon. Ranges reflect 1σ uncertainties. Stoichiometric ratios account for complete oxidation (OC + O<sub>2</sub> → CO<sub>2</sub>; FeS<sub>2</sub> + 3/4 O<sub>2</sub> + 3/2 H<sub>2</sub>O → FeO(OH) + 2H<sup>+</sup> + 2SO<sub>4</sub><sup>2-</sup> (1.875:1 mass O<sub>2</sub>:S)). 1 mol FeS<sub>2</sub> (120g) consumes 1.875 mol O<sub>2</sub> (60g). Thus 41.6 Tg S/yr × (32g S/mol)/(120g FeS<sub>2</sub>/mol) × 1.875 × 32g O<sub>2</sub>/mol = 78 Tg O<sub>2</sub>/yr

## S13. Synthesis of O<sub>2</sub> and CO<sub>2</sub> Deficits During the Ghost Interval

The Ghost Interval (GI; 7.5–2.3 kyr BP) caused an 80% decline in the Congo Basin's peatland O<sub>2</sub> flux (from 25–30 Tg O<sub>2</sub> yr<sup>-1</sup> to 5–6 Tg O<sub>2</sub> yr<sup>-1</sup>), which impacted both O<sub>2</sub> and CO<sub>2</sub> budgets:

### 1. O<sub>2</sub> Deficit

- Total O<sub>2</sub> production during GI: 30–36 Pg O<sub>2</sub> (6 kyr × 5–6 Tg O<sub>2</sub> yr<sup>-1</sup>).

- Expected O<sub>2</sub> without GI: 150–180 Pg O<sub>2</sub> (assuming sustained pre-GI rates).
- O<sub>2</sub> deficit: 120–144 Pg O<sub>2</sub> (missed production due to aridity).
  - Equivalent to ~50% of potential Holocene output (203–227 Pg O<sub>2</sub> if GI had not occurred).

## 2. CO<sub>2</sub> Sequestration Deficit

Using the measured O<sub>2</sub>/C stoichiometry (1.025 mol O<sub>2</sub>/mol C):

- C loss: 120–144 Pg O<sub>2</sub> deficit × 0.366 Tg C/Tg O<sub>2</sub> = 44–53 Pg C.
- CO<sub>2</sub> equivalent: 44–53 Pg C × 3.67 = 161–194 Pg CO<sub>2</sub>.

## S14. Carbon Cycle Perturbation Thresholds

The ghost interval’s carbon perturbation, which we estimated at  $\Delta m_{GI} = 44\text{--}53$  Pg C over  $\tau_{env} = 6$  kyr, is evaluated against Rothman’s (2017) critical size ( $M_c \approx 0.0082 \pm 0.0041$ , equivalent to  $\Delta m_c \approx 310 \pm 155$  Pg C) and critical rate ( $r_c \approx 0.0016 \pm 0.0005$  kyr<sup>-1</sup>) thresholds for catastrophic carbon cycle destabilization on long timescales as observed in four of the “Big Five” mass extinctions (e.g., end-Permian,  $M = 0.243$ ,  $\tau_{env} = 60$  kyr; Fig. 2B, p. 4). The critical rate  $r_c$  indicates that carbon additions exceeding 0.16% of the ocean’s carbon mass per thousand years (~61 Pg C/kyr) on short timescales risk catastrophic outcomes.

The normalized mass of C for the Ghost Interval in Congo,  $M_{GI} = \Delta m_{GI} / m^*$  ( $m^* \approx 38,000$  Pg C, the modern ocean inorganic carbon), ranges from 0.00116 (44 Pg C) to 0.00140 (53 Pg C), well below  $M_c$ , indicating that the perturbation’s magnitude was indeed insufficient to trigger global catastrophic change. However, the normalized perturbation rate,  $M_{GI} / \tau_{env}$ , ranges from 0.193 to 0.233 kyr<sup>-1</sup> (ie. 7.33–8.83 Pg C/kyr, the raw rate of carbon addition), exceeding  $r_c$  by two orders of magnitude, even surpassing the normalized perturbation rate of the Big Five’s rates (0.0023–0.0048 kyr<sup>-1</sup>, (26)).

The ghost interval’s rate is extremely rapid relative to the ocean’s carbon mass, suggesting potential for destabilization if sustained for ~35–42 kyr (approaching  $M_c \sim 310$  Pg C imbalance). However, the Ghost Interval’s brief duration (6 kyr) and limited mass, coupled with possible compensation from other global regions, averted catastrophe. In contrast, the end-Permian (~252 Ma,  $M = 0.24$ ,  $\tau = 60$  kyr,  $r = 0.00405$

kyr<sup>-1</sup>) and end-Triassic (~201 Ma,  $M = 0.095$ ,  $\Delta m = 3600$  Pg C,  $\tau = 20$  kyr,  $r = 0.00475$  kyr<sup>-1</sup>) perturbations rates (26) exceeded the critical rate and, with durations of 60 kyr and 20 kyr, amassed carbon imbalances ( $\Delta m_{\text{Permian}} = 9234$  Pg C,  $\Delta m_{\text{Triassic}} = 3610$  Pg) that crossed  $M_c$ , triggering catastrophic carbon cycle shifts.

S15. Future O<sub>2</sub> flux losses (33–80%, ~33–80 Tg O<sub>2</sub> yr<sup>-1</sup> globally) were estimated by scaling historical flux reductions (80% during the mid-Holocene Ghost Interval, ~7.5–2.3 ka BP, linked to increased aridity in the central Congo Basin (9)). (9) provided quantitative estimates of precipitation with a reduction of annual precipitation of ~35–50 % (if precipitation seasonality is kept invariant) between 5.5 and 2.3 kyr BP, which led to the formation of the Ghost Interval. Other paleoclimate proxy data from East, West, and Central Africa, indicating comparable drying trends during the Ghost Interval. In East Africa, lake sediment records from Lake Chala suggest a 20–40% reduction in annual rainfall relative to early Holocene levels, driven by weakened monsoon intensity (27). In West Africa, pollen and lake-level reconstructions from Lake Bosumtwi indicate a 15–35% rainfall decline, associated with a southward shift of the Intertropical Convergence Zone (ITCZ) (28). For Central Africa, marine sediment cores off the Congo River mouth show a 20–45% reduction in terrestrial runoff, reflecting decreased precipitation in the Congo Basin (29). These regional estimates (15–45% rainfall reduction) align with the Congo Basin’s aridification during the Ghost Interval (9), halving carbon burial rates and causing the observed 80% O<sub>2</sub> flux decline (this work).

These historical drying trends are consistent with CMIP6-projected rainfall declines for Central Africa (20–40% by 2100 under SSP5-8.5 (30)), which predict increased aridity due to weakened monsoon circulation and ITCZ contraction. Assuming a linear relationship between rainfall reduction and O<sub>2</sub> flux loss, a 20–40% rainfall decline by 2100 could reduce global peatland O<sub>2</sub> fluxes by 28–93% (~27.8–92.3 Tg O<sub>2</sub> yr<sup>-1</sup>), as reduced inundation accelerates organic matter oxidation. These projections are conservative, as nonlinear feedbacks (e.g., vegetation shifts) may amplify flux losses.

221  
  
222  

---

223  
  
224  
  
225  
  
226  
  
227  
  
228  
  
229  
  
230  
  
231  
232  
233  
234  
235  
236  
237  
238  
239  
240  
241  
242  
243  
244  
245  
246  
247  
248  
249  
250  
251  
252  
253  
254  
255

1. M. E. Galvez, S. L. Jaccard, Redox capacity of rocks and sediments by high temperature chalcometric titration. *Chemical Geology*, 120016 (2021).
2. P. Richet, *The physical basis of thermodynamics: With applications to chemistry*. (Springer Science & Business Media, 2001).
3. G. C. Dargie *et al.*, Age, extent and carbon storage of the central Congo Basin peatland complex. *Nature* **542**, 86-90 (2017).
4. R. A. Berner, Biogeochemical cycles of carbon and sulfur and their effect on atmospheric oxygen over phanerozoic time. *Palaeogeography, Palaeoclimatology, Palaeoecology* **75**, 97-122 (1989).
5. J. Menges *et al.*, Environmental and climatic evolution of a river-proximal peatland in the Cuvette Centrale, Congo Basin. *Quaternary Science Reviews* **363**, 109445 (2025).
6. M. Blaauw, J. A. Christen, Flexible paleoclimate age-depth models using an autoregressive gamma process. (2011).
7. P. J. Reimer *et al.*, The IntCal20 Northern Hemisphere radiocarbon age calibration curve (0–55 cal kBP). *Radiocarbon* **62**, 725-757 (2020).
8. A. G. Hogg *et al.*, SHCal20 Southern Hemisphere calibration, 0–55,000 years cal BP. *Radiocarbon* **62**, 759-778 (2020).
9. Y. Garcin *et al.*, Hydroclimatic vulnerability of peat carbon in the central Congo Basin. *Nature* **612**, 277-282 (2022).
10. J. D. Hemingway, D. H. Rothman, S. Z. Rosengard, V. V. Galy, An inverse method to relate organic carbon reactivity to isotope composition from serial oxidation. *Biogeosciences* **14**, 5099 (2017).
11. E. Lafargue, F. Marquis, D. Pillot, Les applications de Rock-Eval 6 dans l'exploration et la production des hydrocarbures, et dans les études de contamination des sols. *Oil & Gas Science and Technology - Rev. IFP* **53**, 421-437 (1998).

12. F. Behar, V. Beaumont, H. D. B. Pentead, Rock-Eval 6 technology: performances and developments. *Oil & Gas Science and Technology* **56**, 111-134 (2001).
13. J.-R. Disnar, B. Guillet, D. Kéravis, C. Di-Giovanni, D. Sebag, Soil organic matter (SOM) characterization by Rock-Eval pyrolysis: scope and limitations. *Organic geochemistry* **34**, 327-343 (2003).
14. A. A. Delahaie *et al.*, Elemental stoichiometry and Rock-Eval® thermal stability of organic matter in French topsoils. *SOIL* **9**, 209-229 (2023).
15. B. Crezee *et al.*, Mapping peat thickness and carbon stocks of the central Congo Basin using field data. *Nature Geoscience* **15**, 639-644 (2022).
16. L. V. Gatti *et al.*, Amazonia as a carbon source linked to deforestation and climate change. *Nature* **595**, 388-393 (2021).
17. M. Gloor *et al.*, The carbon balance of South America: a review of the status, decadal trends and main determinants. *Biogeosciences* **9**, 5407-5430 (2012).
18. D. A. Hansell, C. A. Carlson, D. J. Repeta, R. Schlitzer, Dissolved organic matter in the ocean: A controversy stimulates new insights. *Oceanography* **22**, 202-211 (2009).
19. D. A. Hansell, Recalcitrant dissolved organic carbon fractions. (2013).
20. S. E. Page, J. O. Rieley, C. J. Banks, Global and regional importance of the tropical peatland carbon pool. *Global change biology* **17**, 798-818 (2011).
21. T. J. Kelly, I. T. Lawson, K. H. Roucoux, T. R. Baker, E. N. H. Coronado, Patterns and drivers of development in a west Amazonian peatland during the late Holocene. *Quaternary Science Reviews* **230**, 106168 (2020).
22. G. Hugelius *et al.*, Large stocks of peatland carbon and nitrogen are vulnerable to permafrost thaw. *Proceedings of the National Academy of Sciences* **117**, 20438-20446 (2020).
23. C. C. Treat *et al.*, Widespread global peatland establishment and persistence over the last 130,000 y. *Proceedings of the National Academy of Sciences* **116**, 4822-4827 (2019).
24. R. A. Berner, Burial of organic carbon and pyrite sulfur in the modern ocean: its geochemical and environmental significance. *Am. J. Sci.:(United States)* **282**, (1982).
25. R. G. Hilton, A. J. West, Mountains, erosion and the carbon cycle. *Nature Reviews Earth & Environment* **1**, 284-299 (2020).
26. D. H. Rothman, Thresholds of catastrophe in the Earth system. *Science Advances* **3**, (2017).
27. D. Verschuren, K. R. Laird, B. F. Cumming, Rainfall and drought in equatorial east Africa during the past 1,100 years. *Nature* **403**, 410-414 (2000).
28. T. M. Shanahan *et al.*, The time-transgressive termination of the African Humid Period. *Nature Geoscience* **8**, 140-144 (2015).
29. E. Schefuß, S. Schouten, R. R. Schneider, Climatic controls on central African hydrology during the past 20,000 years. *Nature* **437**, 1003-1006 (2005).
30. V. Masson-Delmotte *et al.*, Climate change 2021: the physical science basis. *Contribution of working group I to the sixth assessment report of the intergovernmental panel on climate change* **2**, 2391 (2021).
